# Supplementary material for: The Relationship between Executive Functions and Language Production in 5–6-Year-Old Children: Insights from Working Memory and Storytelling
Source: Behav Sci (Basel). 2020 Feb 5;10(2):52. doi: 10.3390/bs10020052 (PMC7071471; doi:10.3390/bs10020052)
Supplement: Supplementary file 1 [file behavsci-10-00052-s001.pdf]

**Table S1.** Scoring procedure of linguistic variables.

| Linguistic variables                  | Description                                                                                                                                                                                                                                                                                                                                                                              |
|---------------------------------------|------------------------------------------------------------------------------------------------------------------------------------------------------------------------------------------------------------------------------------------------------------------------------------------------------------------------------------------------------------------------------------------|
| semantic completeness (0 – 30 points) | in each text there are 10 essential semantic elements that children are supposed to indicate. If a child names this element by him/herself s/he is given 3 points, if s/he mentions it after testor's question s/he is given 1,5 points, if s/he does not mention it at all s/he is given 0 points                                                                                       |
| semantic adequacy A (0 – 3 points)    | <p>0 – a child does not commit any semantic mistakes, his/her story reflects all the necessary semantic units;</p> <p>1 point – a child commits 1 or 2 mistakes, his/her story is complete, still 1-2 semantic units are missing;</p> <p>2 points – 2-3 rude mistakes, some important information is missing;</p> <p>3 points – event description does not correspond to the images;</p> |
| semantic adequacy B (0 – 3 points)    | <p>0 – a child does not commit any semantic mistakes;</p> <p>1 point – 1 mistake or 1 case of semantic distortion;</p> <p>2 points – 2-3 mistakes or 2-3 cases of semantic distortion;</p> <p>3 points – unrealistical event description;</p>                                                                                                                                            |
| programming (0 – 3 points)            | <p>0 – a child produces a whole coherent story;</p> <p>1 point – a child misses some semantic or logical link;</p> <p>2 points – misses important semantic elements, makes semantic repetitions;</p> <p>3 points – gives no coherent story</p>                                                                                                                                           |
| story time                            | in seconds                                                                                                                                                                                                                                                                                                                                                                               |
| speech pace                           | verbal productivity/ story duration ratio                                                                                                                                                                                                                                                                                                                                                |
| number of words (verbal productivity) | total number of words                                                                                                                                                                                                                                                                                                                                                                    |
| number of simple sentences            | a simple sentence has been defined as a sentence that contains one subject and one predicate;                                                                                                                                                                                                                                                                                            |
| narrative structure (0-2 points)      | <p>It means a compliance with the narrative structure (goal-attempt-outcome).</p> <p>0 point – zero or one narrative structural elements;</p> <p>1 point – two narrative structure elements;</p> <p>2 point – all the narrative structure elements;</p>                                                                                                                                  |
| narrative type (0-2 points)           | <p>0 point - distorted narrative;</p> <p>1 point – simplified narrative;</p>                                                                                                                                                                                                                                                                                                             |

|                                     |                                                                                                                                                                                                                                                                                                                                                                                                                             |
|-------------------------------------|-----------------------------------------------------------------------------------------------------------------------------------------------------------------------------------------------------------------------------------------------------------------------------------------------------------------------------------------------------------------------------------------------------------------------------|
|                                     | 2 point – complete narrative;                                                                                                                                                                                                                                                                                                                                                                                               |
| grammatical accuracy (0 – 3 points) | <p>0 point – a child produces a grammatically correct story with various grammatical structures;</p> <p>1 point – a child produces a grammatically correct story, but the sentences are very short and there is no grammatical diversity;</p> <p>2 points – a child makes some grammatical mistakes, simplifies the grammatical structure;</p> <p>3 points – a child makes many grammatical mistakes, omits predicates;</p> |
| number of syntagmas                 | number of verbs and their amplifications                                                                                                                                                                                                                                                                                                                                                                                    |
| lexical accuracy (0 – 3 points)     | <p>0 point – a child produces a lexically correct story with various and correct words;</p> <p>1 point – a child searches the correct words or makes some lexical paraphrases;</p> <p>2 points – a child searches the correct words and makes lexical paraphrases;</p> <p>3 points – many lexical mistakes and poor vocabulary;</p>                                                                                         |

**Table S2.** Number of story readings for children with different working memory (WM) levels.

| Number of story readings | Low WM level | Medium WM level | High WM level |
|--------------------------|--------------|-----------------|---------------|
| 1                        | 45.7%        | 56.6%           | 53.1%         |
| 2                        | 25.0%        | 23.0%           | 26.6%         |
| 3                        | 27.2%        | 20.4%           | 20.3%         |
